# Supplementary material for: A ground state potential energy surface for HONO based on a neural network with exponential fitting functions
Source: Royal Society of Chemistry journal article supplement (doi:10.1039/c7cp04010e), 2017-01-01
Supplement: c7cp04010e1.pdf [file c7cp04010e1.pdf]

# Electronic Supplementary Information for “A Ground State Potential Energy Surface for HONO based on a Neural Network with Exponential Fitting Functions”

Ekadashi Pradhan<sup>a</sup> and Alex Brown<sup>a\*</sup>

## S0 Fit to 1D Potential Energy Curves

To obtain the sum over 1D energies,  $V_{tot}^0(x_i)$ , the potentials for the bond distances were fit to Morse functional form:

$$V(r_i) = A_0[1 - e^{-A_1(r_i - A_2)}]^2. \quad (1)$$

The bond angles (in their cosine form) were fit to a 4th order polynomial, i.e.,

$$V(\cos \theta_i) = A_0 + A_1 \cos(\theta_i) + A_2(\cos \theta_i)^2 + A_3(\cos \theta_i)^3 + A_4(\cos \theta_i)^4. \quad (2)$$

The dihedral angle was fit to  $\cos(nx)$  form:

$$V(\phi) = A_0 + A_1 \cos(\phi) + A_2 \cos(2\phi) + A_3 \cos(3\phi) + A_4 \cos(4\phi). \quad (3)$$

The fitting parameters are presented in Tables S1 and S2. As discussed in the main text, the energy filtering was performed using only the 1D potential fits from the trans geometry; however, data for both the trans- and cis-isomers is presented here.

**Table S1** Fitting Parameters of bond lengths (in au) for trans- and cis-HONO

| Fitting Parameter | A <sub>0</sub> | A <sub>1</sub> | A <sub>2</sub> |
|-------------------|----------------|----------------|----------------|
| trans-HONO        |                |                |                |
| $R_{N=O}$         | 0.234724       | 1.3613         | 2.2109         |
| $R_{ON}$          | 0.071236       | 1.21988        | 2.68149        |
| $R_{OH}$          | 0.1772         | 1.2145         | 1.8254         |
| cis-HONO          |                |                |                |
| $R_{N=O}$         | 0.22438        | 1.3443         | 2.2355         |
| $R_{ON}$          | 0.07585        | 1.27968        | 2.6172         |
| $R_{OH}$          | 0.156615       | 1.24114        | 1.84378        |

<sup>a</sup>Department of Chemistry, University of Alberta, Edmonton, Alberta T6G 2G2 Canada. Fax: 780-492-8231; Tel: 780-492-1854; E-mail: alex.brown@ualberta.ca

**Table S2** Fitting parameters for bond angles and dihedral angle of cis- and trans-HONO

| Fitting Parameter  | A <sub>0</sub> | A <sub>1</sub> | A <sub>2</sub> | A <sub>3</sub> | A <sub>4</sub> |
|--------------------|----------------|----------------|----------------|----------------|----------------|
| trans-HONO         |                |                |                |                |                |
| cos $\theta_{ONO}$ | 0.0454297      | 0.289274       | 0.57919        | 0.445615       | 0.265011       |
| cos $\theta_{HON}$ | 0.00483919     | 0.0470909      | 0.123341       | 0.0478834      | 0.0299907      |
| $\phi$             | 0.0103183      | 0.00118698     | -0.0096204     | -0.000340861   | -0.000142621   |
| cis-HONO           |                |                |                |                |                |
| cos $\theta_{ONO}$ | 0.0675922      | 0.398938       | 0.786201       | 0.662467       | 0.357884       |
| cos $\theta_{HON}$ | 0.0081536      | 0.062814       | 0.145385       | 0.0737161      | 0.045309       |
| $\phi$             | 0.0111641      | -0.000004713   | -0.0104423     | -0.00032032    | 0.000195262    |

**Table S3** Previous experimental and theoretical<sup>a</sup> values for the bond distances (Å) and angles (degrees), defining the equilibrium geometry for trans-HONO, cis-HONO and the transition state (TS<sub>trans↔cis</sub>).

| Methods                                | R <sub>N=O</sub> | R <sub>ON</sub> | R <sub>OH</sub> | $\theta_{ONO}$ | $\theta_{HON}$ | $\phi$ |
|----------------------------------------|------------------|-----------------|-----------------|----------------|----------------|--------|
| trans-HONO                             |                  |                 |                 |                |                |        |
| CCSD(T)/cc-pVQZ(fc) <sup>1</sup>       | 1.1690           | 1.4178          | 0.9684          | 110.76         | 102.08         | 180.0  |
| CCSD(T)/cc-pwCVQZ(ae) <sup>1</sup>     | 1.1693           | 1.4175          | 0.9644          | 110.75         | 102.12         | 180.0  |
| CCSD(T)/cc-pVQZ(-g) (fc) <sup>2</sup>  | 1.170            | 1.426           | 0.964           | 110.70         | 101.90         | 180.00 |
| CCSD(T)/TZ2P(fc) <sup>3</sup>          | 1.173            | 1.453           | 0.966           | 110.50         | 101.40         | 180.00 |
| MP2/6-311++G(d,p)(ae) <sup>4</sup>     | 1.1786           | 1.4181          | 0.9677          | 111.04         | 101.93         | 180.0  |
| MP4SDTQ/6-311+G(d,p) (fc) <sup>4</sup> | 1.1817           | 1.4522          | 0.9698          | 110.97         | 101.52         | 180.0  |
| B3LYP/6-311++G(d,p) <sup>5</sup>       | 1.166            | 1.433           | 0.969           | 111.20         | 102.90         | 180.00 |
| B3LYP/6-311G(3df,3pd) <sup>6</sup>     | 1.163            | 1.430           | 0.966           | 111.0          | 102.5          | 180.0  |
| Experiment <sup>1</sup>                | 1.1689(3)        | 1.4250(3)       | 0.9647(6)       | 110.69(8)      | 102.086(45)    | 180.0  |
| Experiment <sup>7</sup>                | 1.173(2)         | 1.441(2)        | 0.947(3)        | 110.5(2)       | 102.1(2)       | 180.0  |
| Experiment <sup>8,b</sup>              | 1.185            | 1.392           | 0.982           | 113.6          | 104.0          | 180.00 |
| Experiment <sup>9</sup>                | 1.170            | 1.432           | 0.958           | 110.7          | 102.1          | 180.00 |
| Experiment <sup>10</sup>               | 1.169            | 1.442           | 0.959           | 110.6          | 102.1          | 180.0  |
| cis-HONO                               |                  |                 |                 |                |                |        |
| CCSD(T)/cc-pVQZ (fc) <sup>11</sup>     | 1.1841           | 1.3863          | 0.9750          | 113.22         | 104.52         | 0.00   |
| CCSD(T)/cc-pVQZ(-g) (fc) <sup>2</sup>  | 1.183            | 1.390           | 0.974           | 113.20         | 104.40         | 0.00   |
| CCSD(T)/TZ2P(fc) <sup>3</sup>          | 1.187            | 1.414           | 0.974           | 113.00         | 104.30         | 0.00   |
| MP2/6-311++G(d,p)(ae) <sup>4</sup>     | 1.1921           | 1.3809          | 0.9780          | 113.44         | 105.34         | 0.0    |
| MP4SDTQ/6-311+G(d,p) (fc) <sup>4</sup> | 1.1976           | 1.4081          | 0.9793          | 113.35         | 104.86         | 0.0    |
| B3LYP/6-311++G(d,p) <sup>5</sup>       | 1.180            | 1.392           | 0.980           | 113.9          | 106.8          | 0.0    |
| B3LYP/6-311G(3df,3pd) <sup>6</sup>     | 1.176            | 1.387           | 0.978           | 113.7          | 105.8          | 0.0    |
| Experiment <sup>11</sup>               | 1.1816(10)       | 1.3887(10)      | 0.9744(7)       | 113.18(1)      | 104.67(4)      | 0.00   |
| Experiment <sup>7</sup>                | 1.190(5)         | 1.397(6)        | 0.973(3)        | 113.5(3)       | 104.4(4)       | 0.0    |
| Experiment <sup>8,b</sup>              | 1.170            | 1.432           | 0.958           | 110.7          | 102.1          | 0.00   |
| Experiment <sup>9</sup>                | 1.185            | 1.392           | 0.982           | 113.6          | 104.0          | 0.0    |
| Experiment <sup>10</sup>               | 1.186            | 1.399           | 0.989           | 113.6          | 103.9          | 0.0    |
| TS <sub>trans↔cis</sub>                |                  |                 |                 |                |                |        |
| CCSD(T)/cc-pVQZ(-g) (fc) <sup>2</sup>  | 1.164            | 1.506           | 0.962           | 110.50         | 100.70         | 86.40  |
| MP2/6-311++G(d,p)(ae) <sup>4</sup>     | 1.1652           | 1.5120          | 0.9690          | 111.43         | 102.54         | 85.53  |
| B3LYP/6-311G(3df,3pd) <sup>6</sup>     | 1.153            | 1.500           | 0.967           | 111.5          | 104.4          | 87.8   |

<sup>a</sup> Several of the references contain equilibrium geometries computed with multiple methods and basis sets. Generally only the values determined using the highest level(s) of theory are reported here. <sup>b</sup> Provided as given in the original paper but when compared to other values, suggests that the trans- and cis- labels may have been inadvertently switched.

**Table S4** CCSD(T)-F12/cc-pVTZ-F12 (F12) optimized geometries including bond distances (Å) and angles (degrees), of HNO<sub>2</sub>, TS<sub>trans↔HNO<sub>2</sub></sub> and TS<sub>HONO↔1,3HONO</sub>. Also provided are experimental and previous theoretical results.

| Methods                                        | R <sub>N=O</sub> | R <sub>O-N</sub> | R <sub>O-H</sub>   | θ <sub>O-N-O</sub> | θ <sub>H-O-N</sub> | φ      |
|------------------------------------------------|------------------|------------------|--------------------|--------------------|--------------------|--------|
| HNO <sub>2</sub>                               |                  |                  |                    |                    |                    |        |
| CCSD(T)-F12/cc-pVTZ-F12 <sup>a</sup>           | 1.217            | 1.217            | 1.911              | 128.00             | 29.09              | 180.00 |
| CCSD(T)/TZ2P(fc) <sup>12</sup>                 | 1.225            | 1.225            | 1.917              | 128.20             | 28.97              | 180.00 |
| B3LYP/6-311G(3df,3pd) <sup>6</sup>             | 1.231            | 1.231            | 1.936              | 128.70             | 29.29              | 180.00 |
| B3LYP/6-311++G(d,p) <sup>5</sup>               | 1.216            | 1.216            | 1.044 <sup>a</sup> | 104.4              | 180.0              |        |
| TS <sub>trans↔HNO<sub>2</sub></sub>            |                  |                  |                    |                    |                    |        |
| CCSD(T)-F12/cc-pVTZ-F12 <sup>a</sup>           | 1.189            | 1.319            | 1.301              | 53.57              | 123.23             | 180.00 |
| CCSD(T)/aug-cc-pVTZ <sup>a</sup>               | 1.194            | 1.325            | 1.304              | 53.32              | 123.34             | 180.00 |
| B3LYP/6-311G(3df,3pd) <sup>6</sup>             | 1.188            | 1.317            | 1.300              | 53.80              | 123.50             | 180.00 |
| TS <sub>HONO↔1,3HONO</sub>                     |                  |                  |                    |                    |                    |        |
| CCSD(T)-F12/cc-pVTZ-F12 <sup>a</sup>           | 1.262            | 1.262            | 1.299              | 105.06             | 76.99              | 0.00   |
| CCSD(T)/aug-cc-pVTZ <sup>a</sup>               | 1.268            | 1.268            | 1.298              | 104.86             | 76.84              | 0.00   |
| B3LYP/6-311G(3df,3pd) <sup>6</sup>             | 1.260            | 1.260            | 1.304              | 105.30             | 77.40              | 0.00   |
| CCSD(T)/aug-cc-pVQZ(-g functions) <sup>2</sup> | 1.265            | 1.265            | 1.298              | 105.10             | 76.90              | 0.00   |

<sup>a</sup> Present Work; <sup>b</sup> R<sub>NH</sub>**Table S5** T<sub>1</sub> diagnostic<sup>13</sup> from the CCSD of the CCSD(T)-F12/cc-pVTZ-F12 computations at the corresponding optimized geometries

|                                     | T <sub>1</sub> |
|-------------------------------------|----------------|
| trans-HONO                          | 0.0210         |
| TS <sub>cis↔trans</sub>             | 0.0191         |
| cis-HONO                            | 0.0209         |
| HNO <sub>2</sub>                    | 0.0200         |
| TS <sub>trans↔HNO<sub>2</sub></sub> | 0.0266         |
| TS <sub>HONO↔1,3HONO</sub>          | 0.0246         |

**Table S6** Harmonic vibrational frequencies and zero point energies (ZPE) (both in cm<sup>-1</sup>) for the trans-HONO, cis-HONO, HNO<sub>2</sub>, TS\_ct (transition state of cis-trans isomerization), TS\_12(transition state of trans-HONO tautomerization to H-NO<sub>2</sub>) and TS\_13 (transition state of 1,3-H migration of Hydrogen). All results determined at the CCSD(T)-F12/cc-pVTZ-F12 level of theory.

| Frequencies | trans  | cis    | HNO <sub>2</sub> | TS_ct    | TS_12     | TS_13     | OH+NO  |
|-------------|--------|--------|------------------|----------|-----------|-----------|--------|
|             | 577.0  | 649.0  | 788.0            | 593.0(i) | 2125.5(i) | 1962.3(i) |        |
|             | 636.0  | 679.0  | 1040.3           | 555.7    | 465.2     | 1019.3    |        |
|             | 836.0  | 899.0  | 1385.5           | 788.4    | 692.0     | 1238.4    |        |
|             | 1320.0 | 1350.0 | 1511.5           | 1121.2   | 1293.4    | 1283.2    |        |
|             | 1732.0 | 1677.0 | 1649.4           | 1730.7   | 1584.2    | 1366.2    | 1916.7 |
|             | 3780.0 | 3623.0 | 3265.8           | 3773.3   | 2496.3    | 2135.2    | 3741.9 |
| ZPE         | 4440.5 | 4438.5 | 4820.3           | 3984.7   | 3265.6    | 3521.1    | 2829.3 |

**Table S7** Harmonic frequencies (in  $\text{cm}^{-1}$ ) of the fundamental modes for trans-HONO. The intensities (in  $\text{km/mol}$ ) are provided when determined.

| Mode    | MP2/AVTZ <sup>a</sup> | CCSD(T)           |        |        | F12 <sup>b</sup> | Expt. <sup>c</sup> |
|---------|-----------------------|-------------------|--------|--------|------------------|--------------------|
|         |                       | AVTZ <sup>a</sup> | AVQZ   | AV5Z 5 |                  |                    |
| OH      | 3754.8 (90.4)         | 3760.0 (72.9)     | 3779.3 | 3782   | 3780.0           | 3590.7             |
| N=O     | 1659.9 (108.6)        | 1715.4 (133.2)    | 1728.3 | 1729.6 | 1732.0           | 1699.8             |
| HON     | 1283.4 (174.5)        | 1306.1 (170.1)    | 1315.7 | 1317.0 | 1320.0           | 1263.1             |
| O-N     | 805.3 (159.4)         | 815.9 (145.6)     | 830.0  | 833.7  | 836.0            | 790.1              |
| ONO     | 602.5 (196.0)         | 617.4 (121.8)     | 630.4  | 634.0  | 636.0            | 595.6              |
| Torsion | 586.5 (99.3)          | 565.1 (97.2)      | 575.7  | 576.0  | 577.0            | 543.8              |
| RMSE    | 71.9                  | 72.6              | 84.6   | 86.4   | 86.5             | -                  |

<sup>a</sup> Harmonic frequencies and intensities from CFOUR software<sup>14</sup><sup>b</sup> CCSD(T)-F12/cc-pVTZ-F12 level of theory<sup>c</sup> (Torsion, ONO bend) from Ref. 15; (ON stretching, HON bend) from Ref. 16; N=O stretching from Ref. 17; and OH stretching from Ref. 18**Table S8** Harmonic vibrational frequencies (in  $\text{cm}^{-1}$ ) of the fundamental modes of cis-HONO. The intensities (in  $\text{km/mol}$ ) are provided when determined.

| Mode    | MP2/AVTZ <sup>a</sup> | CCSD(T)           |        |        | F12 <sup>b</sup> | Expt. <sup>c</sup> |
|---------|-----------------------|-------------------|--------|--------|------------------|--------------------|
|         |                       | AVTZ <sup>a</sup> | AVQZ   | AV5Z   |                  |                    |
| OH      | 3591.2 (37.6)         | 3608.4 (29.3)     | 3622.7 | 3625.6 | 3623.0           | 3426.2             |
| N=O     | 1610.7 (141.7)        | 1658.3 (166.5)    | 1670.4 | 1674.0 | 1677.0           | 1640.5             |
| HON     | 1320.2 (7.0)          | 1337.4 (9.6)      | 1348.0 | 1351.2 | 1350.0           | 1302.0             |
| O-N     | 884.2 (359.4)         | 876.4 (298.5)     | 895.0  | 898.3  | 899.0            | 851.0              |
| ONO     | 634.0 (36.3)          | 631.9 (26.2)      | 645.4  | 648.7  | 649.0            | 609.0              |
| Torsion | 693.7 (97.7)          | 667.5 (97.3)      | 681.4  | 685.0  | 679.0            | 638.5              |
| RMSE    | 74.0                  | 78.1              | 88.3   | 90.6   | 89.4             | -                  |

<sup>a</sup> Harmonic frequencies and intensities from CFOUR software<sup>14</sup>; <sup>b</sup> CCSD(T)-F12/cc-pVTZ-F12 level of theory; <sup>c</sup> From Ref. 8**Table S9** The energy difference (in  $\text{cm}^{-1}$ ) between trans-HONO and cis-HONO without ZPE correction ( $\Delta E$ ) and with ZPE correction ( $\Delta E_{ZPE}$ ) as determined using various levels of theory.

| Method                                    | $\Delta E(\text{cm}^{-1})$ | $\Delta E_{ZPE}(\text{cm}^{-1})$ |
|-------------------------------------------|----------------------------|----------------------------------|
| MP2 /aug-cc-pVTZ                          | 179.5                      | 198.9                            |
| CCSD(T)/aug-cc-pVTZ                       | 167.9                      | 171.4                            |
| CCSD(T)/aug-cc-pVQZ                       | 136.0                      | 137.7                            |
| CCSD(T)/aug-cc-pV5Z                       | 122.4                      | 127.7                            |
| CCSD(T)-F12A/cc-pVTZ-F12                  | 122.0                      | 120.0                            |
| CCSD(T)-F12B/cc-pVTZ-F12                  | 124.0                      | 122.0                            |
| CCSD(T)-F12A/cc-pVTZ-F12/PES <sup>a</sup> | —                          | 125.1                            |
| CCSD(T)/CBS/PES <sup>a</sup>              | —                          | 122.0                            |

<sup>a</sup> As determined from MCTDH computations of the ZPE on the corresponding PESs fit with 90 NN.

**Table S10** trans-HONO 2D grid. Bond lengths are in a.u. and bond angles are in degrees.

| Coordinates        | Grid points                                            |
|--------------------|--------------------------------------------------------|
| $R_1^{N=O}$        | [1.99,2.05,2.1,2.15,2.21,2.246,2.28,2.32,2.4,2.5]      |
| $R_2^{O-N}$        | [2.33,2.45,2.53,2.61,2.681,2.765,2.845,2.96,3.14,3.32] |
| $R_3^{O-H}$        | [1.56,1.67,1.72,1.77,1.825,1.874,1.91,1.99,2.09,2.24]  |
| $\Theta_1^{ONO}$   | [98,101,104,107,109,110.69,112.5,114.8,119,123,130]    |
| $\Theta_2^{HON}$   | [80,89,94,97,100,102.26,104.5,108,112,117,125]         |
| Torsion ( $\phi$ ) | [90,120,140,155,165,170,174,177,179,180]               |

**Table S11** cis-HONO 2D grid. Bond lengths are in a.u. and bond angles are in degrees.

| Coordinates        | Grid points                                              |
|--------------------|----------------------------------------------------------|
| $R_1^{N=O}$        | [1.99,2.05,2.1,2.15,2.2515,2.246,2.28,2.32,2.4,2.5]      |
| $R_2^{O-N}$        | [2.33,2.45,2.53,2.61,2.62194,2.765,2.845,2.96,3.14,3.32] |
| $R_3^{O-H}$        | [1.56,1.67,1.72,1.77,1.85268,1.874,1.91,1.99,2.09,2.24]  |
| $\Theta_1^{ONO}$   | [98,101,104,107,109,113.3026,112.5,114.8,119,123,130]    |
| $\Theta_2^{HON}$   | [80,89,94,98,101,104.6118,106,108,112,117,125]           |
| Torsion ( $\phi$ ) | [70,60,45,35,25,15,9,6,3,0]                              |

**Table S12**  $TS_{trans \leftrightarrow cis}$ -HONO 2D grid. Bond lengths are in a.u. and bond angles are in degrees.

| Coordinates        | Grid points                                          |
|--------------------|------------------------------------------------------|
| $R_1^{N=O}$        | [1.99,2.06,2.12,2.16,2.194,2.23,2.29,2.34,2.45,2.57] |
| $R_2^{O-N}$        | [2.35,2.5,2.6,2.71,2.819,2.93,3.06,3.19,3.47,3.9]    |
| $R_3^{O-H}$        | [1.57,1.65,1.73,1.76,1.827,1.875,1.94,2.0,2.13,2.3]  |
| $\Theta_1^{ONO}$   | [99,102,105,107.5,109.5,111.19,113,115,119,122,125]  |
| $\Theta_2^{HON}$   | [81,88,93,97.5,101,103.439,106,109,112.5,119,127]    |
| Torsion ( $\phi$ ) | [37,54,65,74,82,86.91,90.5,97,106,117,137]           |

**Table S13** RMSE vs NN of HONO

| Number of<br>Neurons (NN) | RMSE (in $\text{cm}^{-1}$ ) |          |         |          |
|---------------------------|-----------------------------|----------|---------|----------|
|                           | F12                         |          | CBS     |          |
|                           | Testset                     | Trainset | Testset | Trainset |
| 20                        | 96.9                        | 101.9    | 104.4   | 91.0     |
| 30                        | 49.1                        | 46.9     | 51.3    | 41.3     |
| 40                        | 31.6                        | 30.8     | 32.3    | 24.2     |
| 50                        | 22.6                        | 21.1     | 20.3    | 14.0     |
| 60                        | 19.8                        | 18.0     | 15.1    | 9.9      |
| 70                        | 15.1                        | 13.8     | 12.8    | 8.4      |
| 80                        | 11.0                        | 7.8      | 13.0    | 9.3      |
| 90                        | 10.2                        | 8.5      | 10.4    | 6.8      |
| 100                       | 12.2                        | 10.4     | 10.5    | 7.0      |

**Table S14** Refitting previous PES<sup>2</sup> with NN-expnn; MCTDH vibrational states of trans-HONO and cis-HONO Number of neurons is 80 here. 5k, 7k, 8k, 9k, and 10k represent 5000, 700, 8000, 9000, and 10000 cm<sup>-1</sup> cut-off energy PES, respectively.

|            | Torsion | ONO bend | ON str | HON bend | N=O str | OH str | ZPE    |
|------------|---------|----------|--------|----------|---------|--------|--------|
| trans-HONO |         |          |        |          |         |        |        |
| Ref [2]    | 538.0   | 601.0    | 796.0  | 1267.0   | 1698.0  | 3590.0 | 4367.6 |
| 5k         | 538.4   | 601.1    | 796.1  | 1267.5   | 1690.0  | 3587.0 | 4364.2 |
| 7k         | 538.0   | 601.0    | 795.0  | 1268.0   | 1690.0  | 3589.0 | 4365.4 |
| 8k         | 539.2   | 600.7    | 795.6  | 1268.2   | 1689.4  | 3586.0 | 4364.6 |
| 9k         | 537.5   | 600.5    | 794.4  | 1267.5   | 1689.0  | 3586.7 | 4366.8 |
| 10K        | 534.5   | 601.0    | 796.0  | 1268.6   | 1685.0  | 3587.5 | 4371.6 |
| cis-HONO   |         |          |        |          |         |        |        |
| 'Ref [2]   | 632.0   | 617.0    | 850.0  | 1312.0   | 1637.0  | 3436.0 | 4461.5 |
| 5k         | 632.2   | 617.2    | 850.1  | 1311.4   | 1632.8  | 3432.5 | 4457.7 |
| 7k         | 631.3   | 617.0    | 850.5  | 1311.0   | 1632.4  | 3436.0 | 4457.1 |
| 8k         | 629.2   | 616.3    | 850.3  | 1310.0   | 1634.0  | 3432.0 | 4458.5 |
| 9k         | 629.1   | 616.0    | 850.0  | 1310.0   | 1631.6  | 3434.3 | 4458.3 |
| 10k        | 632.0   | 616.0    | 848.5  | 1307.6   | 1633.6  | 3437.4 | 4458.7 |

**Table S15** Vibrational frequencies of selected overtones and combination modes (in cm<sup>-1</sup>) of trans-HONO for the CBS\_345 90 NN fit PES.

| (v <sub>1</sub> v <sub>2</sub> v <sub>3</sub> v <sub>4</sub> v <sub>5</sub> v <sub>6</sub> ) <sup>a</sup> | This work |         | Previous Expt.       | Guilmot <i>et al.</i> <sup>17</sup> | Richter <i>et al.</i> <sup>2</sup> |
|-----------------------------------------------------------------------------------------------------------|-----------|---------|----------------------|-------------------------------------|------------------------------------|
|                                                                                                           | F12       | CBS     |                      |                                     |                                    |
| 020000                                                                                                    | 3402.1    | 3374.5  | 3372.1 <sup>b</sup>  | 3372.1                              | 3367.4                             |
| 101000                                                                                                    | 4220.2    | 4384.2  | 4379.0 <sup>c</sup>  | 4378.3                              |                                    |
| 100100                                                                                                    | 4853.7    | 4830.1  | 4829.0 <sup>c</sup>  | 4829.6                              |                                    |
| 100200                                                                                                    | 6078.8    | 6052.4  |                      | 6045.8                              |                                    |
| 200000                                                                                                    | 7190.6    | 7012.1  | 7017.0 <sup>c</sup>  | 7016.8                              |                                    |
| 300000                                                                                                    | 10301.0   | 10297.0 | 10279.0 <sup>c</sup> | 10280.5                             |                                    |
| 400000                                                                                                    | 13489.0   | 13507.0 | 13385.0 <sup>c</sup> |                                     |                                    |

<sup>a</sup> v<sub>1</sub>: CH stretch. (A'), v<sub>2</sub>: N=O stretch. (A'), v<sub>3</sub>: ON stretch. (A'), v<sub>4</sub>: HON bend. (A'), v<sub>5</sub>:ONO bend. (A') and v<sub>6</sub>: out-of-plane bend. (A''); <sup>b</sup> From Ref. 19; <sup>c</sup> From Ref. 20

**Table S16** Vibrational frequencies of selected overtones and combination modes (in cm<sup>-1</sup>) of cis-HONO for the CBS\_345 90 NN fit PES.

| (v <sub>1</sub> v <sub>2</sub> v <sub>3</sub> v <sub>4</sub> v <sub>5</sub> v <sub>6</sub> ) <sup>a</sup> | This work |        | Previous Expt.      | Guilmot <i>et al.</i> <sup>21</sup> | Richter <i>et al.</i> <sup>2</sup> |
|-----------------------------------------------------------------------------------------------------------|-----------|--------|---------------------|-------------------------------------|------------------------------------|
|                                                                                                           | F12       | CBS    |                     |                                     |                                    |
| 011000                                                                                                    | 2531.9    | 2515.9 | 2493.0 <sup>b</sup> | 2492.9                              | 2476.7                             |
| 020000                                                                                                    | 3292.2    | 3264.7 | 3257.9 <sup>c</sup> | 3257.9                              | 3253.6                             |
| 101000                                                                                                    | 4317.1    | 4297.8 | 4281.0 <sup>d</sup> | 4281.0                              |                                    |
| 200000                                                                                                    | 6876.0    | 6676.7 | 6665.0 <sup>d</sup> | 6664.4                              |                                    |

<sup>a</sup> v<sub>1</sub>: CH stretch. (A'), v<sub>2</sub>: N=O stretch. (A'), v<sub>3</sub>: ON stretch. (A'), v<sub>4</sub>: HON bend. (A'), v<sub>5</sub>:ONO bend. (A') and v<sub>6</sub>: out-of-plane bend. (A''); <sup>b</sup> From Ref. 22; <sup>c</sup> From Ref. 15; <sup>d</sup> From Ref. 20

## S0 CBS\_345 Extrapolated PES of HONO using 90 NN: Operator file

OP.DEFINE-SECTION

title

HONO r1 = OH, r2 = N=O, r3 = ON, th1 = HON, th2 = ONO, p1 = torsion

This operator file is for cos-DVR for p.1 defined on [0,pi].

end-title

end-op\_define-section

PARAMETER-SECTION

q20 = 2.696732586, q30 = 1.822912197, q10 = 2.21332641, q11 = 1.8653, th20 = 1.777642018, th10 = 1.9315017, mh = 1.0, H-mass, mc = 12.0,AMU, mo = 15.9949,AMU, mn = 13.9939,AMU, M11 = 1.0/mo+1.0/mh, M22 = 1.0/mo+1.0/mn, M33 = M22, M13 = 1.0/mo, M23 = -1.0/mn, p1 = PI/2.0, p2 = 3.0\*PI/2.0  
, r0 = -0.0989292117084, w0u0 = -0.853200541447781, w0u1 = -0.242988044034525, w0u2 = 0.032555967181883, w0u3 = -3.167126278444403, w0u4 = 1.023820200338571, w0u5 = -0.577240957387413, r1 = -1508.01439595, w1u0 = -1.116352239758439, w1u1 = -1.220201517521363, w1u2 = -0.082661674734828, w1u3 = 2.947379294597612, w1u4 = 1.462903126335998, w1u5 = -0.634283038194566, r2 = -0.128339800865, w2u0 = -1.385927636257777, w2u1 = 0.219465874494011, w2u2 = 0.177429964888646, w2u3 = -2.425039201771836, w2u4 = -0.833476901989908, w2u5 = 0.025621397776061, r3 = 0.0013726184638, w3u0 = 1.172164241523227, w3u1 = -0.046358169379889, w3u2 = -0.510518623086877, w3u3 = -0.902072221830776, w3u4 = 0.810623163825699, w3u5 = 0.247067857977654, r4 = -26.831252236, w4u0 = -0.830803569743358, w4u1 = -1.254738392767832, w4u2 = -0.052145281280020, w4u3 = 2.433613560792109, w4u4 = 0.788339918473749, w4u5 = 0.287896108863929, r5 = 2.06716395215, w5u0 = -1.139502618837195, w5u1 = -0.745780602007849, w5u2 = -0.144726792484251, w5u3 = 2.521648506611887, w5u4 = -0.628725231599676, w5u5 = 0.830876257902396, r6 = -1780.7073866, w6u0 = -0.174941901862294, w6u1 = -1.552455925722280, w6u2 = 0.528321481092629, w6u3 = 0.870364481774773, w6u4 = 0.930407607983181, w6u5 = -2.549588002817600, r7 = -6.38328173171, w7u0 = -0.913923338264948, w7u1 = -0.008661645227680, w7u2 = -0.985703331513715, w7u3 = 0.416036304537306, w7u4 = 0.110828177799288, w7u5 = -0.029286582009631, r8 = -5.81956169623, w8u0 = -0.135284485884308, w8u1 = -0.756002099321000, w8u2 = 0.011881233056163, w8u3 = 0.209568220113634, w8u4 = -0.331784935201660, w8u5 = -0.140061782546228, r9 = 27.9797440321, w9u0 = -0.083882765867326, w9u1 = -0.003920098550541, w9u2 = -3.291668678940854, w9u3 = 0.040412533788156, w9u4 = -0.000834420720384, w9u5 = -0.002462237001581, r10 = -0.0253279567409, w10u0 = -0.001170018143470, w10u1 = 0.196830207136118, w10u2 = -0.054412522758295, w10u3 = -1.945917804810354, w10u4 = -0.709593222350115, w10u5 = -0.089766870498877, r11 = 98.4626718188, w11u0 = -3.262419556847753, w11u1 = -0.110957884054188, w11u2 = 0.177158207998086, w11u3 = 0.154254582503147, w11u4 = 0.070920532770424, w11u5 = 0.014359565042413, r12 = 12.681082388, w12u0 = -0.441581732986989, w12u1 = -2.085985476420360, w12u2 = 1.593200968323242, w12u3 = 4.239052477949012, w12u4 = 1.912412741392200, w12u5 = -0.410189143178070, r13 = 60.7842797092, w13u0 = -0.007757010932104, w13u1 = -1.849278243352667, w13u2 = 0.316486564320230, w13u3 = 0.002283216008185, w13u4 = 1.065513138556361, w13u5 = 0.740150097599871, r14 = 302.88029365, w14u0 = 0.042851034679758, w14u1 = -1.683351419041932, w14u2 = 0.284225602714214, w14u3 = -0.213896900552025, w14u4 = 0.299100130731710, w14u5 = -1.349385144150157, r15 = -4.48807896894d-06, w15u0 = 0.607708924306238, w15u1 = 0.426576944920903, w15u2 = 1.712110145997201, w15u3 = -1.411032256844647, w15u4 = -0.552983689791342, w15u5 = 0.228822602002352, r16 = 0.0216293358866, w16u0 = -2.131474531082708, w16u1 = 1.311118087753804, w16u2 = 0.368320618243550, w16u3 = -1.344277324684069, w16u4 = -0.808790548757823, w16u5 = -0.002424788885103, r17 = 0.00158638367554, w17u0 = -0.784269168971525, w17u1 = 0.333758298135627, w17u2 = 0.352940486491789, w17u3 = -1.227408509846475, w17u4 = -0.148142379584223, w17u5 = 0.652270253883597, r18 = 0.000227158475832, w18u0 = 0.758572710520038, w18u1 = 0.417239790748004, w18u2 = 0.114856949700676, w18u3 = 1.501277180953857, w18u4 = 2.682662326012086, w18u5 = -0.554418157956709, r19 = 0.000139366976479, w19u0 = 1.143215612528171, w19u1 = -0.290214640082409, w19u2 = 0.518999082645808, w19u3 = 1.702906874775170, w19u4 = -1.329319112341047, w19u5 = 0.266271389891513, r20 = -101.19900991, w20u0 = -0.476776755992009, w20u1 = -0.976681652891100, w20u2 = 0.180554624366756, w20u3 = 1.387920647609959, w20u4 = -0.588509397942507, w20u5 = -1.144615710998483, r21 = -2.23384787572, w21u0 = -0.048995644555810, w21u1 = -1.570467878270445, w21u2 = -0.471327235755910, w21u3 = 0.887074121265057, w21u4 = -2.313439432967188, w21u5 = 0.451814747021784, r22 = -22.0913040748, w22u0 = -0.305088924550694, w22u1 = -1.548481227852525, w22u2 = -0.176945143494662, w22u3 = 1.275086376167996, w22u4 = -1.560524658481483, w22u5 = 0.365415909969871, r23 = -574.969181043, w23u0 = 0.048244606725621, w23u1 = -1.738542745787764, w23u2 = 0.290286663994938, w23u3 = -0.205220464482039, w23u4 = 0.581857557864165, w23u5 = -0.604455373831783, r24 = 3.38195755122, w24u0 = -0.181860523296136, w24u1 = -1.367671219069719, w24u2 = -0.200237326825643, w24u3 = 0.246814670149435, w24u4 = -1.814169510762366, w24u5 = -0.321163641280683, r25 = 5.56916957922, w25u0 = -1.211123452136019, w25u1 = -0.925633687152736, w25u2 = 0.376581147047806, w25u3 = 1.592679628065842, w25u4 = 3.036450254631379, w25u5 = -0.603234808841615, r26 = -3.60255222952d-05, w26u0 = 0.946857763941655, w26u1 = 0.895864786558203, w26u2 = 0.709734683038783, w26u3 = 1.379115858238740, w26u4 = 1.570465761487129, w26u5 = -0.014818140556473, r27 = -0.0529327316423, w27u0 = -0.552611745806075, w27u1 = -0.237250987650281, w27u2 = 0.092855747811619, w27u3 = -2.222441791074366, w27u4 = -0.911055094237467, w27u5 = 0.459298832167413, r28 = -0.00208806646172, w28u0 = -2.597222595695893, w28u1 = 2.171083226033266, w28u2 = 0.394856290811928, w28u3 = -0.448033984839479,

w28u4 = -0.695564980839464, w28u5 = -0.006606432251146, r29 = 5230.44961875, w29u0 = -0.208532879423894, w29u1 = -1.522020968063148, w29u2 = 0.538824605293654, w29u3 = 0.965430484869679, w29u4 = 1.095851879665458, w29u5 = -2.373631280783556, r30 = -3.21227572404, w30u0 = -0.884542704955197, w30u1 = -0.896737022464103, w30u2 = -0.394222102962516, w30u3 = 2.233039582570567, w30u4 = -1.636133128361070, w30u5 = 0.697587078088605, r31 = -6.35164830561, w31u0 = -0.052937709043642, w31u1 = -1.954013858263051, w31u2 = 0.363741581766958, w31u3 = 0.161431540826286, w31u4 = 1.400830260036604, w31u5 = 1.323780704237094, r32 = -109.077881759, w32u0 = -0.585039102406441, w32u1 = -2.078217949582065, w32u2 = -0.007409299594651, w32u3 = -1.155802125734104, w32u4 = -0.393628889192751, w32u5 = 0.038064962722235, r33 = 1053.8582557, w33u0 = -0.267602627330121, w33u1 = -1.431376491521275, w33u2 = 0.503371601217953, w33u3 = 1.067634993014797, w33u4 = 1.352712750267209, w33u5 = -1.936652294363815, r34 = 2.79631198739, w34u0 = -0.918900165139691, w34u1 = -1.057722380525383, w34u2 = 0.228113235201292, w34u3 = -3.021541435174714, w34u4 = 0.639675749337384, w34u5 = -0.403032721435919, r35 = 575.430310193, w35u0 = 0.033424232613503, w35u1 = -1.747279572303321, w35u2 = 0.279656984126069, w35u3 = -0.13505586827669, w35u4 = 0.682189038559053, w35u5 = -0.131162586021134, r36 = 0.221496310598, w36u0 = -0.379433266696707, w36u1 = -0.933378015959205, w36u2 = -0.103703587364877, w36u3 = -0.462422980873508, w36u4 = 1.558378531837801, w36u5 = 0.960775931934566, r37 = 1225.4654584, w37u0 = -1.264020557323582, w37u1 = -1.081251242133842, w37u2 = -0.097543709225388, w37u3 = 2.916697966487550, w37u4 = 1.384330203445063, w37u5 = -1.055142598143193, r38 = 61.078809273, w38u0 = -0.897347372506697, w38u1 = -1.260995879578610, w38u2 = 0.048505647756097, w38u3 = 3.641794019756450, w38u4 = 0.822505434555556, w38u5 = -0.176919383794468, r39 = -0.625443964648, w39u0 = -0.190266449096388, w39u1 = -0.770490969723237, w39u2 = -0.023482707308682, w39u3 = -0.336736459632039, w39u4 = 0.987560609610161, w39u5 = 0.531758122229973, r40 = -59.407002278, w40u0 = 0.101214982556129, w40u1 = -1.729413561918831, w40u2 = 0.337413239482047, w40u3 = -0.433940354834691, w40u4 = 0.621133121753826, w40u5 = -1.743321582919458, r41 = 277.396650513, w41u0 = -0.381492688528870, w41u1 = -2.726704556918439, w41u2 = -0.006400992688819, w41u3 = -0.894972531473500, w41u4 = -0.183496909350533, w41u5 = 0.007795157446639, r42 = -44.2859262806, w42u0 = -0.422722654548365, w42u1 = -1.090583834033585, w42u2 = 0.249907769350965, w42u3 = 1.132228901801507, w42u4 = 1.603180065644242, w42u5 = -0.979617410003878, r43 = -19.6124451693, w43u0 = -0.389983349897434, w43u1 = -2.223063549427904, w43u2 = 1.473181471142833, w43u3 = 4.278620420924543, w43u4 = 2.273988166419923, w43u5 = -0.552897232750255, r44 = 181.424316715, w44u0 = -0.043412569150406, w44u1 = -1.622572492810102, w44u2 = 0.365526920710989, w44u3 = 0.252545649182365, w44u4 = 0.214467625921422, w44u5 = -2.642456206447654, r45 = 4.25602381683, w45u0 = -1.686431874230609, w45u1 = -0.748120098063037, w45u2 = 0.736674047787979, w45u3 = 3.356277881527543, w45u4 = 0.727048177960433, w45u5 = -0.537570612793289, r46 = 93.1882305967, w46u0 = -2.846768115677090, w46u1 = -0.235158142655243, w46u2 = -0.313631352999750, w46u3 = -0.091787744040771, w46u4 = -0.207983718116708, w46u5 = -0.008442499858882, r47 = -593.626309794, w47u0 = -1.377215013960184, w47u1 = -1.065705784176306, w47u2 = -0.072209929543213, w47u3 = 2.989465037729329, w47u4 = 1.428535582592924, w47u5 = -1.404041727480120, r48 = 0.125687375803, w48u0 = 0.123282795599564, w48u1 = 0.015229251412603, w48u2 = 0.268107687972553, w48u3 = -0.510112707986040, w48u4 = -0.439426859721460, w48u5 = -0.018049192950398, r49 = 674.485672065, w49u0 = -0.976222860755648, w49u1 = -1.487068810451600, w49u2 = 0.079282666146500, w49u3 = 3.175035561581900, w49u4 = 1.784825395491587, w49u5 = -0.590322608622887, r50 = -0.000361435319442, w50u0 = 0.555175175615836, w50u1 = -0.473300016128945, w50u2 = 1.907919244892818, w50u3 = 1.446672943806077, w50u4 = 0.84668237016211, w50u5 = -0.036336083315722, r51 = -0.911959825282, w51u0 = -0.422815203234790, w51u1 = -0.800658261790613, w51u2 = -0.558546530740072, w51u3 = -0.562989580817477, w51u4 = 2.157705297390107, w51u5 = 0.353618133800870, r52 = -0.00193843512306, w52u0 = 0.065466276243004, w52u1 = 0.400908991238494, w52u2 = 0.573662373066993, w52u3 = 0.728485987200476, w52u4 = -1.207985962482644, w52u5 = -0.051180908647078, r53 = 0.680696692143, w53u0 = -0.087237459061078, w53u1 = -2.046249404573328, w53u2 = 0.404738487390972, w53u3 = 0.327649613801521, w53u4 = 1.629352151511890, w53u5 = 1.731054751161620, r54 = -4562.22979995, w54u0 = -0.231889083735443, w54u1 = -1.493507774086708, w54u2 = 0.534632526298388, w54u3 = 1.017060959587281, w54u4 = 1.202604755798767, w54u5 = -2.220734108774852, r55 = -0.0853555934593, w55u0 = -0.331101426021603, w55u1 = -0.416618238188913, w55u2 = 0.481797863825400, w55u3 = -1.522373726019507, w55u4 = -1.414328234707931, w55u5 = -0.367940662422277, r56 = -0.131660740837, w56u0 = -1.00048599118995, w56u1 = 0.005004485839668, w56u2 = -0.035310021685393, w56u3 = -0.552490896406840, w56u4 = -2.393235242892378, w56u5 = -0.001034305992917, r57 = 50.496012763, w57u0 = -0.447644799218347, w57u1 = -2.235578085887514, w57u2 = 0.038984524343030, w57u3 = 2.248166797902178, w57u4 = -0.252321966638586, w57u5 = 0.046673029006847, r58 = 226.102788325, w58u0 = -1.266574242520516, w58u1 = -0.882399864468584, w58u2 = -0.162486493344137, w58u3 = 2.270452437053196, w58u4 = 1.128341862119909, w58u5 = -0.174725135867112, r59 = 0.189617787097, w59u0 = 0.217939463304283, w59u1 = -0.407462851713085, w59u2 = 0.068815755975560, w59u3 = 0.857681040888670, w59u4 = -0.107851092852573, w59u5 = -0.479890040699518, r60 = 0.0065851328342, w60u0 = 0.543891969469446, w60u1 = 0.267535203389521, w60u2 = 0.483376146094136, w60u3 = 0.602888065420696, w60u4 = 0.736576748500787, w60u5 = 0.041887904288526, r61 = 0.00196145819997, w61u0 = 0.128706401000954, w61u1 = 0.452536634303965, w61u2 = -0.194494772548922, w61u3 = -3.000288590391380, w61u4 = -0.135940362677618, w61u5 = -0.393835531797970, r62 = 81.9552259081, w62u0 = 0.097870478857965, w62u1 = -1.822733467319629, w62u2 = 0.366206691436438, w62u3 = -0.384037460748237, w62u4 = 0.986649036962584, w62u5 = -0.911250749027846, r63 = -2.73782172547, w63u0 = -0.926211410273082, w63u1 = -0.557977509853844, w63u2 = -0.211788744931458, w63u3 = 2.414091010216209, w63u4 = -2.203513719217510, w63u5 = -0.183753981836098, r64 = 7.9684689004, w64u0 = -0.999424259535155, w64u1 = -0.920594756485300, w64u2 = 0.132165427921620, w64u3 = -1.176508103650211, w64u4 = -0.649727851306425, w64u5 = 0.063532190963042, r65 = 6.18655197699, w65u0 = -0.763517986230063, w65u1 = -1.005905916856115, w65u2



= -0.429867628690347 , w65u3 = 2.220634201402487 , w65u4 = -2.257201589168911 , w65u5 = 0.361375759999538 , r66 = -0.341978030449 , w66u0 = -0.784142352746678 ,  
w66u1 = -0.054523436584693 , w66u2 = 0.071387616551653 , w66u3 = 0.454536024102477 , w66u4 = -2.143024795890079 , w66u5 = -0.476333856582223 , r67 = -1.6707158833d-  
06 , w67u0 = 1.690626441104840 , w67u1 = 1.298729920765839 , w67u2 = 0.051470335106372 , w67u3 = -0.067468311648461 , w67u4 = 0.152416959540184 , w67u5 =  
0.034883165324201 , r68 = 0.147663494229 , w68u0 = -0.544923303363188 , w68u1 = -0.224360832524084 , w68u2 = 0.041570984350497 , w68u3 = -2.508904657211773 , w68u4  
= -0.849775638006786 , w68u5 = 0.239066081824531 , r69 = 15.2323310682 , w69u0 = -0.189983711105008 , w69u1 = -1.588756355584520 , w69u2 = -0.213873765953048 , w69u3  
= 1.007957408418801 , w69u4 = -1.601979254521126 , w69u5 = 0.600206354545307 , r70 = -49.8831281127 , w70u0 = -1.655543416717991 , w70u1 = -0.712853480766423 , w70u2  
= 0.122190582046248 , w70u3 = 2.295407348923297 , w70u4 = 1.652406134347526 , w70u5 = -0.144378329693445 , r71 = 0.0870370244542 , w71u0 = -0.541406770781474 ,  
w71u1 = -0.327636083751474 , w71u2 = 0.308053033164774 , w71u3 = -1.439136062385166 , w71u4 = -1.899194449363643 , w71u5 = -0.755097456006860 , r72 = 100.524935445  
 , w72u0 = -0.357024736108426 , w72u1 = -1.167059199296991 , w72u2 = 0.220816918904788 , w72u3 = 1.134737190631993 , w72u4 = -0.401877160883981 , w72u5 = -  
1.474621392140092 , r73 = -203.720774031 , w73u0 = -0.023856811511239 , w73u1 = -1.614848639592133 , w73u2 = 0.285638867312887 , w73u3 = 0.057609205669916 , w73u4  
= 0.002573330168387 , w73u5 = -2.113751429780027 , r74 = -5.87605049756 , w74u0 = -1.026241840785672 , w74u1 = -1.628336027553843 , w74u2 = 0.401381269683886 ,  
w74u3 = -2.978011789556087 , w74u4 = 0.623249014018689 , w74u5 = -0.465518157446707 , r75 = 27.4126157644 , w75u0 = -0.656353537918256 , w75u1 = -0.664191441448378  
 , w75u2 = 0.106481301362692 , w75u3 = 1.582176871694944 , w75u4 = -1.018782191987313 , w75u5 = -0.668815465280137 , r76 = -12.927468165 , w76u0 = -0.045209861455305  
 , w76u1 = -1.585862665944186 , w76u2 = 0.168865611040203 , w76u3 = -0.275611465280897 , w76u4 = 2.249194348340661 , w76u5 = -0.253986320655227 , r77 = 12.496975294  
 , w77u0 = -0.194367695372616 , w77u1 = -1.126078377919176 , w77u2 = -0.213469825153766 , w77u3 = -0.182548682434478 , w77u4 = 2.428232979837427 , w77u5 = -  
0.186778136734243 , r78 = -291.733476682 , w78u0 = 0.017441228154574 , w78u1 = -1.789464719566123 , w78u2 = 0.290848490594049 , w78u3 = -0.082550124047248 , w78u4 =  
0.827006650855694 , w78u5 = 0.266113971665171 , r79 = -0.0123568749458 , w79u0 = 1.093157278117163 , w79u1 = -0.354522112867225 , w79u2 = -0.084186224381153 , w79u3  
= -0.350857088318056 , w79u4 = 0.512649263692106 , w79u5 = -0.019582478201197 , r80 = 0.0468485146234 , w80u0 = -0.597187446533896 , w80u1 = 0.182448374811714 ,  
w80u2 = 0.007499731372618 , w80u3 = -0.193699033262930 , w80u4 = -2.646771277959585 , w80u5 = -0.120831772080295 , r81 = 0.08250396022 , w81u0 = -2.387280457568731 ,  
w81u1 = 1.275128807334748 , w81u2 = 0.353931986674469 , w81u3 = 1.709004017608853 , w81u4 = -0.499425055528652 , w81u5 = -0.042603634930531 , r82 = -3.41343381676  
 , w82u0 = -0.378748052464797 , w82u1 = -0.860100980120145 , w82u2 = -0.651492531568689 , w82u3 = -0.158627662888725 , w82u4 = 3.080812474154300 , w82u5 = -  
0.356363573965471 , r83 = -1.86983043645 , w83u0 = -0.135059536508859 , w83u1 = -1.660306997280813 , w83u2 = -0.173508657991779 , w83u3 = 0.929178005647870 , w83u4 =  
-1.514467259825964 , w83u5 = 0.919236312738092 , r84 = -3.49671817501 , w84u0 = -1.465387484271082 , w84u1 = 0.209201459078548 , w84u2 = 0.083466744329406 , w84u3 =  
-0.358582680143965 , w84u4 = -0.088303057178119 , w84u5 = 0.028397343901877 , r85 = -13.7986625711 , w85u0 = -0.875230690981353 , w85u1 = -1.655258203236874 , w85u2  
= 1.137750415813348 , w85u3 = 3.966978248351146 , w85u4 = 1.169760945877422 , w85u5 = -0.088961687331179 , r86 = -1.7419666959 , w86u0 = -1.893799075323081 , w86u1  
= -0.578109751875194 , w86u2 = 0.566512770615569 , w86u3 = 3.388694189613314 , w86u4 = 0.522269618956901 , w86u5 = 0.830023084172927 , r87 = 1.9440733751 , w87u0 =  
-2.206351009389263 , w87u1 = 0.612150779781037 , w87u2 = -0.073053573472707 , w87u3 = -0.286373241387269 , w87u4 = 0.103607841677780 , w87u5 = 0.003729659405271 ,  
r88 = -5.19267553629 , w88u0 = -1.877925392282306 , w88u1 = 0.158362507414769 , w88u2 = 0.247477318533934 , w88u3 = 2.103789216903190 , w88u4 = -0.159263225339767 ,  
w88u5 = -0.149474375023733 , r89 = 9.39902361112 , w89u0 = -1.119588902850321 , w89u1 = -0.804257372341186 , w89u2 = 0.604351028154454 , w89u3 = 2.151255306147235  
 , w89u4 = 0.771871330394636 , w89u5 = -0.607304936238123

c = 0.013478924

end-parameter-section

LABELS-SECTION

q1 = exp1[-0.70,q10]

q2 = exp1[-0.70,q20]

q3 = exp1[-0.70,q30]

t1 = acos[1.0 0.0 th20]

t2 = acos[1.0 0.0 th10]

qs1 = qs[1.0]

g1 = gauss[1.0,q10]

g2 = gauss[1.0/9.0,q20]

g3 = gauss[0.25,q30]

g4 = tgauss[0.25,th10]

g5 = tgauss[0.25,th20]

```

c1 = gauss[-4.0,q10]
c2 = gauss[-1.0,q20]
c3 = gauss[-4.0,q30]
c4 = tgauss[-4.0,th10]
c5 = tgauss[-4.0,th20]
g0pi = gauss[2.0,0.0]
g1pi = gauss[2.0,PI]
g2pi = gauss[2.0,2.0*PI]
cos2 = cos[2.0]
cos3 = cos[3.0]
cos4 = cos[4.0]
st1 = step[p1]
st2 = rstep[p2]
# General form of the labels are given in order to save space.
# qiuj = exp[wiuj, 0.0]
# Where i goes from 0 to 89 and j goes from 0 to 5.
# So, there will be 90x6 = 540 labels term in this operator file.
end-labels-section
HAMILTONIAN-SECTION

```

---

```

modes | r_2 | r_3 | r_1 | t_2 | t_1 | p_1

```

---

```

-M11/2.0 | 1 | 1 | dq2 | 1 | 1 | 1
-M22/2.0 | dq2 | 1 | 1 | 1 | 1 | 1
-M33/2.0 | 1 | dq2 | 1 | 1 | 1 | 1
-M13 | 1 | dq | dq | 1 | q | 1
M23 | dq | dq | 1 | q | 1 | 1
-M13 | 1 | q^1 | q^1 | 1 | q | 1
M23 | q^1 | q^1 | 1 | q | 1 | 1
-M13 | 1 | q^1 | dq | 1 | udq2 | 1
M13 | 1 | q^1 | dq | udq | qs1 | cos
-M23 | dq | q^1 | 1 | qs1 | udq | cos
M23 | dq | q^1 | 1 | udq2 | 1 | 1
-M13 | 1 | dq | q^1 | 1 | udq2 | 1
M23 | q^1 | dq | 1 | udq2 | 1 | 1
M13 | 1 | q^1 | dq | q*qs1^1 | qs1 | sdq
-M23 | dq | q^1 | 1 | qs1 | q*qs1^1 | sdq
-M11/2.0 | 1 | 1 | q^2 | 1 | dq*qs1^2*dq | 1
-M33/2.0 | 1 | q^2 | 1 | 1 | dq*qs1^2*dq | 1
M13 | 1 | q^1 | q^1 | 1 | dq*qs1^2*q*dq | 1
-M22/2.0 | q^2 | 1 | 1 | dq*qs1^2*dq | 1 | 1
-M33/2.0 | 1 | q^2 | 1 | dq*qs1^2*dq | 1 | 1
-M23 | q^1 | q^1 | 1 | dq*qs1^2*q*dq | 1 | 1
-M13/2.0 | 1 | q^1 | q^1 | qs1*dq | dq*q*qs1 | cos

```

-M13/2.0 | 1 | q<sup>1</sup> | q<sup>1</sup> | dq\*qs1 | q\*qs1\*dq | cos  
M23/2.0 | q<sup>1</sup> | q<sup>1</sup> | 1 | q\*qs1\*dq | dq\*qs1 | cos  
M23/2.0 | q<sup>1</sup> | q<sup>1</sup> | 1 | dq\*q\*qs1 | qs1\*dq | cos  
M33/2.0 | 1 | q<sup>2</sup> | 1 | qs1\*dq | dq\*qs1 | cos  
M33/2.0 | 1 | q<sup>2</sup> | 1 | dq\*qs1 | qs1\*dq | cos  
-M13/2.0 | 1 | q<sup>1</sup> | q<sup>1</sup> | q\*qs1<sup>1</sup> | dq\*q\*qs1 | sdq  
-M13/2.0 | 1 | q<sup>1</sup> | q<sup>1</sup> | q\*qs1<sup>1</sup> | q\*qs1\*dq | sdq  
-M13/4.0 | 1 | q<sup>1</sup> | q<sup>1</sup> | q\*qs1<sup>1</sup> | q<sup>2</sup>\*qs1<sup>1</sup> | cos  
M13/4.0 | 1 | q<sup>1</sup> | q<sup>1</sup> | q\*qs1<sup>1</sup> | qs1 | cos  
M23 | q<sup>1</sup> | q<sup>1</sup> | 1 | qs1<sup>1</sup> | udq | sdq  
-0.25\*M23 | q<sup>1</sup> | q<sup>1</sup> | 1 | qs1<sup>1</sup> | q\*qs1<sup>1</sup> | cos  
M33 | 1 | q<sup>2</sup> | 1 | q\*qs1<sup>1</sup> | udq | sdq  
M23/2.0 | q<sup>1</sup> | q<sup>1</sup> | 1 | dq\*q\*qs1 | q\*qs1<sup>1</sup> | sdq  
M23/2.0 | q<sup>1</sup> | q<sup>1</sup> | 1 | q\*qs1\*dq | q\*qs1<sup>1</sup> | sdq  
M23/4.0 | q<sup>1</sup> | q<sup>1</sup> | 1 | q<sup>2</sup>\*qs1<sup>1</sup> | q\*qs1<sup>1</sup> | cos  
-M23/4.0 | q<sup>1</sup> | q<sup>1</sup> | 1 | qs1 | q\*qs1<sup>1</sup> | cos  
-M13 | 1 | q<sup>1</sup> | q<sup>1</sup> | udq | qs1<sup>1</sup> | sdq  
-M13/4.0 | 1 | q<sup>1</sup> | q<sup>1</sup> | q\*qs1<sup>1</sup> | qs1<sup>1</sup> | cos  
M33 | 1 | q<sup>2</sup> | 1 | udq | q\*qs1<sup>1</sup> | sdq  
-M11/2.0 | 1 | 1 | q<sup>2</sup> | 1 | qs1<sup>2</sup> | dq<sup>2</sup>  
M13/2.0 | 1 | q<sup>1</sup> | q<sup>1</sup> | q\*qs1<sup>1</sup> | qs1<sup>1</sup> | cos\*dq<sup>2</sup>  
M13/2.0 | 1 | q<sup>1</sup> | q<sup>1</sup> | q\*qs1<sup>1</sup> | qs1<sup>1</sup> | dq<sup>2</sup>\*cos  
M13/2.0 | 1 | q<sup>1</sup> | q<sup>1</sup> | q\*qs1<sup>1</sup> | qs1<sup>1</sup> | cos  
M13 | 1 | q<sup>1</sup> | q<sup>1</sup> | 1 | q\*qs1<sup>2</sup> | dq<sup>2</sup>  
-M22/2.0 | q<sup>2</sup> | 1 | 1 | qs1<sup>2</sup> | 1 | dq<sup>2</sup>  
-M23/2.0 | q<sup>1</sup> | q<sup>1</sup> | 1 | qs1<sup>1</sup> | q\*qs1<sup>1</sup> | dq<sup>2</sup>\*cos  
-M23/2.0 | q<sup>1</sup> | q<sup>1</sup> | 1 | qs1<sup>1</sup> | q\*qs1<sup>1</sup> | cos\*dq<sup>2</sup>  
-M23 | q<sup>1</sup> | q<sup>1</sup> | 1 | q\*qs1<sup>2</sup> | 1 | dq<sup>2</sup>  
-M33/2.0 | 1 | q<sup>2</sup> | 1 | 1 | q<sup>2</sup>\*qs1<sup>2</sup> | dq<sup>2</sup>  
-M33/2.0 | 1 | q<sup>2</sup> | 1 | q<sup>2</sup>\*qs1<sup>2</sup> | 1 | dq<sup>2</sup>  
-M33/2.0 | 1 | q<sup>2</sup> | 1 | q\*qs1<sup>1</sup> | q\*qs1<sup>1</sup> | dq<sup>2</sup>\*cos  
-M33/2.0 | 1 | q<sup>2</sup> | 1 | q\*qs1<sup>1</sup> | q\*qs1<sup>1</sup> | cos\*dq<sup>2</sup>

---

c | 1 | 1 | 1 | 1 | 1 | 1

# The following lines would have the following genral form

ri | qiu0 | qiu1 | qiu2 | qiu3 | qiu4 | qiu5

# So, total 90 lines will be there; i goes from 0 to 89

---

end-hamiltonian-section

HAMILTONIAN-SECTION.cis

usediag

---

modes | r\_2 | r\_3 | r\_1 | t\_2 | t\_1 | p\_1

---

5.862318d-6 | q<sup>1</sup> | 1 | 1 | 1 | 1 | 1 | 1  
-3.674923d-5 | dq<sup>2</sup> | 1 | 1 | 1 | 1 | 1 | 1  
0.199815 | q1<sup>0</sup> | 1 | 1 | 1 | 1 | 1 | 1  
-0.1995720744 | g1 | 1 | 1 | 1 | 1 | 1 | 1  
-0.02919914 | g1\*q1 | 1 | 1 | 1 | 1 | 1 | 1  
0.4880250 | g1\*q1<sup>2</sup> | 1 | 1 | 1 | 1 | 1 | 1  
-1.303379 | g1\*q1<sup>3</sup> | 1 | 1 | 1 | 1 | 1 | 1  
0.9694112 | g1\*q1<sup>4</sup> | 1 | 1 | 1 | 1 | 1 | 1

---

1.152891d-5 | 1 | q<sup>1</sup> | 1 | 1 | 1 | 1 | 1  
-3.6749237d-5 | 1 | dq<sup>2</sup> | 1 | 1 | 1 | 1 | 1  
0.199815 | 1 | q2<sup>0</sup> | 1 | 1 | 1 | 1 | 1  
-0.19939010 | 1 | g2 | 1 | 1 | 1 | 1 | 1  
0.017770776 | 1 | g2\*q2 | 1 | 1 | 1 | 1 | 1  
0.1326029 | 1 | g2\*q2<sup>2</sup> | 1 | 1 | 1 | 1 | 1  
-0.19864533 | 1 | g2\*q2<sup>3</sup> | 1 | 1 | 1 | 1 | 1  
0.0963012354 | 1 | g2\*q2<sup>4</sup> | 1 | 1 | 1 | 1 | 1

---

3.243973d-6 | 1 | 1 | q<sup>1</sup> | 1 | 1 | 1 | 1  
-2.893093d-4 | 1 | 1 | dq<sup>2</sup> | 1 | 1 | 1 | 1  
0.199815 | 1 | 1 | q3<sup>0</sup> | 1 | 1 | 1 | 1  
-0.1997286 | 1 | 1 | g3 | 1 | 1 | 1 | 1  
-0.01330962 | 1 | 1 | g3\*q3<sup>1</sup> | 1 | 1 | 1 | 1  
0.41641177 | 1 | 1 | g3\*q3<sup>2</sup> | 1 | 1 | 1 | 1  
-0.50147370 | 1 | 1 | g3\*q3<sup>3</sup> | 1 | 1 | 1 | 1  
0.23521044 | 1 | 1 | g3\*q3<sup>4</sup> | 1 | 1 | 1 | 1  
-0.4574862 | 1 | 1 | g3\*q3<sup>5</sup> | 1 | 1 | 1 | 1  
0.8193689 | 1 | 1 | g3\*q3<sup>6</sup> | 1 | 1 | 1 | 1

---

-6.65897d-6 | 1 | 1 | 1 | q | 1 | 1 | 1  
-1.26493d-5 | 1 | 1 | 1 | dq\*qs1<sup>2</sup>\*dq | 1 | 1 | 1  
6.65897d-6 | 1 | 1 | 1 | dq\*q\*qs1<sup>2</sup>\*dq | 1 | 1 | 1  
0.199815 | 1 | 1 | 1 | t2<sup>0</sup> | 1 | 1 | 1  
-0.1992434 | 1 | 1 | 1 | g4 | 1 | 1 | 1  
-0.026653980 | 1 | 1 | 1 | g4\*t2 | 1 | 1 | 1  
0.27134390 | 1 | 1 | 1 | g4\*t2<sup>2</sup> | 1 | 1 | 1  
-0.26446122 | 1 | 1 | 1 | g4\*t2<sup>3</sup> | 1 | 1 | 1  
0.23762334 | 1 | 1 | 1 | g4\*t2<sup>4</sup> | 1 | 1 | 1

---

-7.07777d-6 | 1 | 1 | 1 | 1 | q | 1 | 1  
-9.06079d-5 | 1 | 1 | 1 | 1 | dq\*qs1<sup>2</sup>\*dq | 1 | 1 | 1  
7.07777d-6 | 1 | 1 | 1 | 1 | dq\*q\*qs1<sup>2</sup>\*dq | 1 | 1 | 1  
0.199815 | 1 | 1 | 1 | 1 | t1<sup>0</sup> | 1 | 1 | 1  
-0.1996101 | 1 | 1 | 1 | 1 | g5 | 1 | 1 | 1

-0.00931089145 | 1 | 1 | 1 | 1 | g5\*t1 | 1  
 0.058163918856 | 1 | 1 | 1 | 1 | g5\*t1<sup>2</sup> | 1  
 -0.05969423564 | 1 | 1 | 1 | 1 | g5\*t1<sup>3</sup> | 1  
 0.02626388225 | 1 | 1 | 1 | 1 | g5\*t1<sup>4</sup> | 1

---

-1.14605d-4 | 1 | 1 | 1 | 1 | dq<sup>2</sup>  
 -3.07824d-6 | 1 | 1 | 1 | 1 | dq<sup>2</sup>\*cos  
 -3.07824d-6 | 1 | 1 | 1 | 1 | cos\*dq<sup>2</sup>  
 -7.172084d-5 | 1 | 1 | 1 | 1 | cos  
 -0.0104828 | 1 | 1 | 1 | 1 | cos2  
 -0.000334943 | 1 | 1 | 1 | 1 | cos3  
 0.000171863 | 1 | 1 | 1 | 1 | cos4  
 0.006 | 1 | 1 | 1 | 1 | g1pi

---

end-hamiltonian-section  
 HAMILTONIAN-SECTION.trans  
 useddiag

---

modes | r.2 | r.3 | r.1 | t.2 | t.1 | p.1

---

5.130465d-6 | q<sup>a</sup> | 1 | 1 | 1 | 1 | 1  
 -3.674923d-5 | dq<sup>2</sup> | 1 | 1 | 1 | 1 | 1  
 0.200239252946 | q1<sup>0</sup> | 1 | 1 | 1 | 1 | 1  
 -0.200239252946 | g1 | 1 | 1 | 1 | 1 | 1  
 0.47224 | g1\*q1<sup>2</sup> | 1 | 1 | 1 | 1 | 1  
 -1.28108 | g1\*q1<sup>3</sup> | 1 | 1 | 1 | 1 | 1  
 1.01278 | g1\*q1<sup>4</sup> | 1 | 1 | 1 | 1 | 1

---

1.0114998d-5 | q<sup>a</sup> | 1 | 1 | 1 | 1 | 1  
 -3.6749237d-5 | dq<sup>2</sup> | 1 | 1 | 1 | 1 | 1  
 0.200239252946 | q2<sup>0</sup> | 1 | 1 | 1 | 1 | 1  
 -0.200239252946 | g2 | 1 | 1 | 1 | 1 | 1  
 0.148565 | g2\*q2<sup>2</sup> | 1 | 1 | 1 | 1 | 1  
 -0.20644 | g2\*q2<sup>3</sup> | 1 | 1 | 1 | 1 | 1  
 0.1018 | g2\*q2<sup>4</sup> | 1 | 1 | 1 | 1 | 1

---

2.611952d-6 | q<sup>a</sup> | 1 | 1 | 1 | 1 | 1  
 -2.893093d-4 | dq<sup>2</sup> | 1 | 1 | 1 | 1 | 1  
 0.2002393 | q3<sup>0</sup> | 1 | 1 | 1 | 1 | 1  
 -0.2002393 | g3 | 1 | 1 | 1 | 1 | 1  
 0.42615 | g3\*q3<sup>2</sup> | 1 | 1 | 1 | 1 | 1  
 -0.49848 | g3\*q3<sup>3</sup> | 1 | 1 | 1 | 1 | 1  
 0.29256 | g3\*q3<sup>4</sup> | 1 | 1 | 1 | 1 | 1  
 -0.36536 | g3\*q3<sup>5</sup> | 1 | 1 | 1 | 1 | 1

0.54825 | 1 | 1 | g3\*q3<sup>6</sup> | 1 | 1 | 1

-6.56776d-6 | 1 | 1 | 1 | q | 1 | 1

-1.25549d-5 | 1 | 1 | 1 | dq\*qs1<sup>2</sup>\*dq | 1 | 1

6.56776d-6 | 1 | 1 | 1 | dq\*q\*qs1<sup>2</sup>\*dq | 1 | 1

0.200239252946 | 1 | 1 | 1 | t2<sup>0</sup> | 1 | 1

-0.200239252946 | 1 | 1 | 1 | g4 | 1 | 1

0.28985 | 1 | 1 | 1 | g4\*t2<sup>2</sup> | 1 | 1

-0.173188 | 1 | 1 | 1 | g4\*t2<sup>3</sup> | 1 | 1

0.16913 | 1 | 1 | 1 | g4\*t2<sup>4</sup> | 1 | 1

-6.97676d-6 | 1 | 1 | 1 | 1 | q | 1 | 1

-9.21157d-5 | 1 | 1 | 1 | 1 | dq\*qs1<sup>2</sup>\*dq | 1 | 1

6.97676d-6 | 1 | 1 | 1 | 1 | dq\*q\*qs1<sup>2</sup>\*dq | 1 | 1

0.200239252946 | 1 | 1 | 1 | 1 | t1<sup>0</sup> | 1 | 1

-0.200239252946 | 1 | 1 | 1 | 1 | g5 | 1 | 1

0.0471315 | 1 | 1 | 1 | 1 | g5\*t1<sup>2</sup> | 1 | 1

-0.0446942 | 1 | 1 | 1 | 1 | g5\*t1<sup>3</sup> | 1 | 1

0.0120094 | 1 | 1 | 1 | 1 | g5\*t1<sup>4</sup> | 1 | 1

-1.131196d-4 | 1 | 1 | 1 | 1 | 1 | dq<sup>2</sup>

-2.481013d-6 | 1 | 1 | 1 | 1 | 1 | dq<sup>2</sup>\*cos

-2.481013d-6 | 1 | 1 | 1 | 1 | 1 | cos\*dq<sup>2</sup>

0.001091769 | 1 | 1 | 1 | 1 | 1 | cos

-0.00967354 | 1 | 1 | 1 | 1 | 1 | cos2

-0.358768d-3 | 1 | 1 | 1 | 1 | 1 | cos3

0.122464d-3 | 1 | 1 | 1 | 1 | 1 | cos4

0.005 | 1 | 1 | 1 | 1 | 1 | g0pi

0.005 | 1 | 1 | 1 | 1 | 1 | g2pi

end-hamiltonian-section

end-operator

## S0 CCSD(T)-F12 PES of HONO using 90 NN: Operator file

# Only the parameter section is provided here. The rest of the operator file is exactly same as the above PES

PARAMETER-SECTION

q20 = 2.696732586, q30 = 1.822912197, q10 = 2.21332641, q11 = 1.8653, th20 = 1.777642018, th10 = 1.9315017, mh = 1.0, H-mass, mc = 12.0,AMU, mo = 15.9949,AMU, mn = 13.9939,AMU, M11 = 1.0/mo+1.0/mh, M22 = 1.0/mo+1.0/mn, M33 = M22, M13 = 1.0/mo, M23 = -1.0/mn, p1 = PI/2.0, p2 = 3.0\*PI/2.0, r0 = 2.49062209164d-05, w0u0 = 0.990762672762274, w0u1 = 0.879399098300514, w0u2 = -0.998204926718832, w0u3 = -3.525116141524682, w0u4 = 0.564193127332052, w0u5 = -0.327202610773055, r1 = -2.05316402998, w1u0 = -0.395542270641128, w1u1 = -1.151186698851344, w1u2 = 0.219378454513705, w1u3 = -1.966509202272723, w1u4 = -1.030059216940918, w1u5 = -0.274367178332881, r2 = 0.0216475834271, w2u0 = 0.048679053214609, w2u1 = 0.122714516349700, w2u2 = -0.104010239795143, w2u3 = -0.016503270996388, w2u4 = -1.510131091491883, w2u5 = 0.005220679314363, r3 = 133.614802862, w3u0 = -0.054074894562940, w3u1 = -2.460543661361866, w3u2 = -0.084364690831152, w3u3 = -0.534886395276775, w3u4 = -0.653319356823815, w3u5 = -0.078208399814083, r4 = 10.3237242412, w4u0 = -0.347348858815260, w4u1 = -1.906616800776697, w4u2 = 0.370310069202191, w4u3 = 1.710668349976324, w4u4 = 1.102185002847695, w4u5 = 0.0972851164884847, r5 = 7.669040189, w5u0 = -0.402910337522161, w5u1 = -1.385915888252440, w5u2 = -0.404858103274222, w5u3 = -0.588840647914321, w5u4 = -3.069369689764649, w5u5 = 0.020375375402256, r6 = -5.91026514507, w6u0 = -0.804378870827043, w6u1 = -1.069084033353517, w6u2 = 0.103237338756679, w6u3 = -2.423900835193319, w6u4 = -0.357606996899715, w6u5 = -0.378433389205773, r7 = 24.7361354998, w7u0 = -0.329419372617922, w7u1 = -2.031018159125704, w7u2 = 1.412873846655821, w7u3 = 2.520780909301378, w7u4 = 3.049675854689634, w7u5 = -1.349648165642112, r8 = 0.0176305097524, w8u0 = 0.414279438834839, w8u1 = 0.413385314957824, w8u2 = 0.115766812989557, w8u3 = -0.313605789899979, w8u4 = -0.214954569647355, w8u5 = -0.078896036666991, r9 = -1112.29143858, w9u0 = -0.687344331337495, w9u1 = -1.907545521317971, w9u2 = 0.885639296553834, w9u3 = 2.599644035020769, w9u4 = 2.558669019832703, w9u5 = -1.512478901675200, r10 = 0.182975568461, w10u0 = -0.619865082327824, w10u1



= 0.597403172177595 , w74u5 = 0.929414143101435 , r75 = -0.64998006492 , w75u0 = 0.143637100216835 , w75u1 = -0.584116205048295 , w75u2 = -1.040855609256828 , w75u3 = 1.615763043760753 , w75u4 = 0.568869549198812 , w75u5 = -0.018595012791568 , r76 = 0.034629742118 , w76u0 = -0.692604044438775 , w76u1 = -0.351702435322966 , w76u2 = -0.037460329836420 , w76u3 = -3.670528747267317 , w76u4 = 0.021358018192332 , w76u5 = 0.294824368670593 , r77 = -16.5808390448 , w77u0 = -0.130166643101892 , w77u1 = -2.159867960215742 , w77u2 = 0.374170302518766 , w77u3 = -0.342264786795465 , w77u4 = 1.314601505645211 , w77u5 = 1.227997886655990 , r78 = -2041.39404382 , w78u0 = 0.011388817967271 , w78u1 = -1.903795397923566 , w78u2 = 0.164962450401440 , w78u3 = -0.577824494309113 , w78u4 = 0.342621843885036 , w78u5 = -0.675154616352694 , r79 = -14.6314113804 , w79u0 = -2.01252455932020 , w79u1 = 0.021418605417424 , w79u2 = 0.069822763866368 , w79u3 = 2.270396886264788 , w79u4 = -0.473086654453848 , w79u5 = 0.208108016853280 , r80 = 16.7969729663 , w80u0 = -0.575642256470214 , w80u1 = -0.505919522479461 , w80u2 = -0.090921417109244 , w80u3 = 1.415231650649504 , w80u4 = -0.502997497277590 , w80u5 = -0.252512888738305 , r81 = -5.65431196864 , w81u0 = -0.630769768243796 , w81u1 = 0.067125427397441 , w81u2 = -0.494430337938215 , w81u3 = 0.761563000898776 , w81u4 = -0.240464125726384 , w81u5 = -0.683052161110633 , r82 = 219.735353 , w82u0 = -0.565871906685466 , w82u1 = -1.615916967590171 , w82u2 = 0.366943301270937 , w82u3 = 2.165350364554112 , w82u4 = 1.559417550279331 , w82u5 = 0.040009101005226 , r83 = -0.323541806402 , w83u0 = -0.898282804454125 , w83u1 = -0.191011096900171 , w83u2 = -0.261616913382876 , w83u3 = -2.320657682273762 , w83u4 = 0.563653409811119 , w83u5 = -0.832740778852490 , r84 = 0.464811797795 , w84u0 = -0.902578052504099 , w84u1 = -1.007806643707185 , w84u2 = 0.292732861634498 , w84u3 = -3.208445735678016 , w84u4 = -0.433641679911096 , w84u5 = 0.043892421793918 , r85 = 0.827219022171 , w85u0 = -2.517357331051064 , w85u1 = 0.921597969753833 , w85u2 = -0.137251164255615 , w85u3 = 0.864113435785005 , w85u4 = -0.035859321762436 , w85u5 = -0.252004215826831 , r86 = -1.68819851241 , w86u0 = -0.666177909627336 , w86u1 = -1.308111815646731 , w86u2 = 0.128277257440241 , w86u3 = -2.220724117208560 , w86u4 = -0.240543066345113 , w86u5 = 0.468194664275139 , r87 = 6.26717323305 , w87u0 = -0.498322588399289 , w87u1 = -0.928990011242140 , w87u2 = 0.146651547828329 , w87u3 = -1.445277171265926 , w87u4 = -0.646909280849887 , w87u5 = 0.146439943503560 , r88 = -16.1457473468 , w88u0 = -0.390567216392888 , w88u1 = -0.801577528874908 , w88u2 = -0.078757833548664 , w88u3 = 1.198387538932790 , w88u4 = -0.365248523325655 , w88u5 = -0.715389713364273 , r89 = 0.00417235957961 , w89u0 = -1.228275636693260 , w89u1 = 1.489679611174510 , w89u2 = 0.064685858925743 , w89u3 = -1.921673031852332 , w89u4 = 0.450194447393512 , w89u5 = 0.048709445364414  
c = 0.065600224  
end-parameter-section

## References

- [1] J. Demaison, A. G. Császár and A. Dehayem-Kamadjeu, *J. Phys. Chem. A*, 2006, **110**, 13609–13617.
- [2] F. Richter, M. Hochlaf, P. Rosmus, F. Gatti and H. D. Meyer, *J. Chem. Phys.*, 2004, **120**, 1306–1317.
- [3] T. J. Lee and A. P. Rendell, *J. Chem. Phys.*, 1991, **94**, 6229–6236.
- [4] G. R. De Mare and Y. Moussaoui, *Int. Rev. Phys. Chem.*, 1999, **18**, 91–117.
- [5] D. Luckhaus, *J. Chem. Phys.*, 2003, **118**, 8797–8806.
- [6] B. S. Jursic, *Chem. Phys. Lett.*, 1999, **299**, 334–344.
- [7] A. P. Cox, M. C. Ellis, C. J. Atfield and A. C. Ferris, *J. Mol. Struct.*, 1994, **320**, 91–106.
- [8] C. M. Deeley and I. M. Mills, *Mol. Phys.*, 1985, **54**, 23–32.
- [9] A. P. Cox, A. H. Brittain and D. J. Finnigan, *Trans. Faraday Soc.*, 1971, **67**, 2179–2194.
- [10] D. J. Finnigan, J. G. Smith, A. P. Cox and A. H. Brittain, *J. Chem. Soc., Faraday Trans. 2*, 1972, **68**, 548–565.
- [11] V. Sironneau, J. Orphal, J. Demaison and P. Chelin, *J. Phys. Chem. A*, 2008, **112**, 10697–10702.
- [12] T. J. Lee, *Chem. Phys. Lett.*, 1993, **216**, 194–199.
- [13] T. J. Lee and P. R. Taylor, *Int. J. Quantum Chem. Symp.*, 1989, **23**, 199–207.
- [14] J. F. Stanton, J. Gauss, M. E. Harding and P. G. Szalay, *CFOUR, Coupled-Cluster techniques for Computational Chemistry, a quantum-chemical program package*, 2010, For the current version, see <http://www.cfour.de>.
- [15] C. Deeley and I. Mills, *J. Mol. Struct.*, 1983, **100**, 199–213.
- [16] W. S. Barney, L. M. Wingen, M. J. Lakin, T. Brauers, J. Stutz and B. J. Finlayson-Pitts, *J. Phys. Chem. A*, 2000, **104**, 1692–1699.
- [17] J. Guilmot, M. Godefroid and M. Herman, *J. Mol. Spectrosc.*, 1993, **160**, 387–400.
- [18] J. Guilmot, M. Carleer, M. Godefroid and M. Herman, *J. Mol. Spectrosc.*, 1990, **143**, 81–90.
- [19] A. G. Maki, *J. Mol. Spectrosc.*, 1988, **127**, 104–111.
- [20] S. M. Holland, R. J. Stickland, M. N. R. Ashfold, D. A. Newnham and I. M. Mills, *J. Chem. Soc., Faraday Trans.*, 1991, **87**, 3461–3471.
- [21] J. M. Guilmot, F. Melen and M. Herman, *J. Mol. Spectrosc.*, 1993, **160**, 401–410.
- [22] M. Allegrini, J. W. C. Johns, A. R. W. Mckellar and P. Pinson, *J. Mol. Spectrosc.*, 1980, **79**, 446–454.
